# Supplementary material for: Titanoxycarbene complexes of Ti(iv) with O- and N-donor ligands
Source: Royal Society of Chemistry journal article supplement (doi:10.1039/b715075j), 2008-01-01

## Supporting Information

### Thermolysis of 2.

The tungsten complex **2** (300mg) was dissolved in trioctylphosphine and heated to 250°C for 18h. After cooling, a solid was precipitated by addition of methanol, collected via centrifugation and redispersed in toluene. The TEM image shows ca. 17nm sized particles.

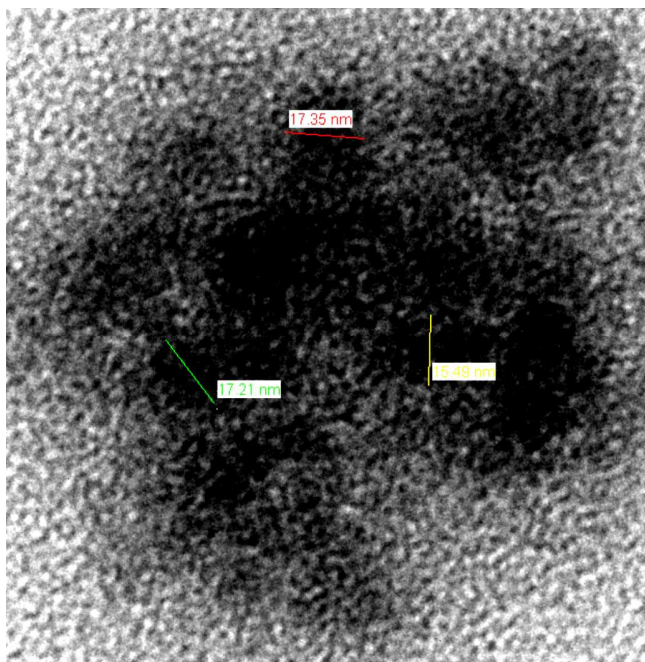

Supplement: b715075j.pdf [file b715075j.pdf]
